# Supplementary material for: Inhaler Technique in Asthma: How Does It Relate to Patients' Preferences and Attitudes Toward Their Inhalers?
Source: PubMed Central journal article supplement — J Aerosol Med Pulm Drug Deliv. 2017 Feb 1;30(1):42–52. doi: 10.1089/jamp.2016.1287 (PMC5278803; doi:10.1089/jamp.2016.1287), 2017-02-01
Supplement: Supp_Appendix1.pdf [file Supp_Appendix1.pdf]

## Supplementary Data

### SUPPLEMENTARY APPENDIX S1. SEMI-STRUCTURED INTERVIEW GUIDE

| <i>Topic</i>                                                                                         | <i>Primary questions</i>                                                         | <i>Clarification</i>                                                                                                                                                                                                                                                                                                                                                                                                                             |
|------------------------------------------------------------------------------------------------------|----------------------------------------------------------------------------------|--------------------------------------------------------------------------------------------------------------------------------------------------------------------------------------------------------------------------------------------------------------------------------------------------------------------------------------------------------------------------------------------------------------------------------------------------|
| 1. Background: understanding of patient experience and perception of inhalers and asthma management. | How is your asthma treated? What is your opinion about your asthma management?   | <p>Could you take me through the medication you are taking for your asthma?</p> <p>What was your treatment when you were first diagnosed?</p> <p>How many different devices have you used for your asthma?</p> <p>How well do you feel your medications are controlling your asthma?</p> <p>Have you ever been admitted to the hospital because of asthma or a complication of asthma? If yes, what do you think was the main reason for it?</p> |
| 2. Confidence with inhaler and inhalation technique.                                                 | How confident are you in using your inhaler?                                     | <p>Who has shown you how to use your inhaler in the past? How helpful was it?</p> <p>How do you evaluate your inhalation technique?</p>                                                                                                                                                                                                                                                                                                          |
| 3. Perception about their role in decision making.                                                   | What is the process for deciding on which inhaler you will need for your asthma? | <p>How much are you involved in decisions about your treatment? Has this involvement changed over time?</p> <p>Have you ever been given a choice in selecting an inhaler? Would this be important for you? Why?</p> <p>Describe the kind of role you would like to have had.</p>                                                                                                                                                                 |
| 4. Overall views on inhalers.                                                                        | What are your overall thoughts about your inhaler?                               | <p>What do you like or dislike about your inhaler?</p> <p>Have you ever thought of changing the inhaler?</p>                                                                                                                                                                                                                                                                                                                                     |
| 5. Reasons for satisfaction.                                                                         | What do you like the most about your inhaler?                                    | <p>What do you like/dislike about your inhaler?</p> <p>Have you ever thought of changing your inhaler?</p> <p>How easy/difficult is it to use?</p>                                                                                                                                                                                                                                                                                               |
| 6. Reasons for dissatisfaction.                                                                      | What are your greatest concerns about your inhaler?                              | <p>What makes you feel you have difficulty with your inhaler?</p> <p>What do you dislike about the operation of your inhaler?</p> <p>Have you ever had difficulty in operating your inhaler during an attack?</p>                                                                                                                                                                                                                                |
| 7. Identification of an ideal inhaler and the specific elements that make it ideal.                  | How would you describe your ideal inhaler?                                       | <p>What aspects of an inhaler are the most important to you and why?</p>                                                                                                                                                                                                                                                                                                                                                                         |
